# Supplementary material for: Molecular Cloning and Functional Analysis of DXS and FPS Genes from Zanthoxylum bungeanum Maxim
Source: MDPI journal article supplement (doi:10.3390/foods11121746), 2022-06-14
Supplement: s1 [file s1]

**Table S4.** Relative expression levels of *ZbFPS* and *ZbDXS* in different tissues.

| Different Tissues | Genes          |               |
|-------------------|----------------|---------------|
|                   | <i>ZbDXS</i>   | <i>ZbFPS</i>  |
| Roots             | 1              | 1             |
| Stems             | 4.9807 ± 0.98  | 0.5053 ± 0.20 |
| Leaves            | 9.7358 ± 1.07  | 2.1202 ± 0.67 |
| Flowers           | 2.8984 ± 0.70  | 0.7868 ± 0.17 |
| Fruits            | 39.9223 ± 2.96 | 4.2896 ± 0.99 |

Note: Taking the gene expression in roots as a reference. The relative mRNA abundance was calculated using the formula:  $2^{-\Delta\Delta C_t}$ . Data are based on a statistical analysis of the means of three biological replications (n=3).
