# Supplementary material for: Molecular Cloning and Functional Analysis of DXS and FPS Genes from Zanthoxylum bungeanum Maxim
Source: MDPI journal article supplement (doi:10.3390/foods11121746), 2022-06-14
Supplement: s1 [file s1]

**Figure S2.** Deduced amino acid sequences of the conser

ved regions of ZbDXS. The conserved domains are boxed. Homology level was highlighted by shading in color: black for 100%, pink for  $\geq 75\%$  and blue for  $\geq 50\%$  identity.

|                        |                                                                                                                                           |     |
|------------------------|-------------------------------------------------------------------------------------------------------------------------------------------|-----|
| Citrus sinensis.       | ... <b>MA</b> SA <b>FF</b> ... <b>TV</b> SP <b>AT</b> NS <b>LE</b> PH <b>MS</b> .SPVTS <b>SH</b> FF <b>EA</b>                             | 33  |
| Durio zibethinus.      | MVL <b>MA</b> MA <b>CA</b> SE <b>FT</b> IN <b>NR</b> .AA <b>DS</b> CA <b>RR</b> ST <b>TP</b> FT <b>SH</b> SS <b>GT</b>                    | 39  |
| Herrania umbratica.    | ... <b>MA</b> CA <b>SE</b> FF <b>VI</b> NR.AA <b>AL</b> PE <b>ST</b> .P <b>FT</b> SH <b>LA</b> GT                                         | 34  |
| Pistacia vera.         | ... <b>MA</b> CA <b>SE</b> FF <b>VI</b> NR <b>AT</b> IT <b>TH</b> PH <b>MS</b> .T <b>LS</b> MS <b>WA</b>                                  | 275 |
| Zanthoxylum bungeanum. | ... <b>MA</b> SA <b>FF</b> ... <b>TH</b> NP <b>AI</b> SD <b>PH</b> MS.S <b>LT</b> TS <b>SH</b> FF <b>EA</b>                               | 33  |
| Consensus              | mal af fp                                                                                                                                 |     |
| Citrus sinensis.       | <b>HP</b> FS <b>HT</b> SC <b>LD</b> EN <b>RO</b> CL... <b>LR</b> HR <b>W</b> AS <b>LS</b> SC <b>RL</b> GL <b>SC</b>                       | 71  |
| Durio zibethinus.      | <b>HL</b> FG <b>SL</b> KL... <b>LV</b> W <b>VR</b> SP <b>TV</b> W <b>AS</b> LS <b>SC</b> RA <b>W</b> SC <b>R</b>                          | 75  |
| Herrania umbratica.    | <b>HL</b> FG <b>SL</b> KL... <b>LV</b> W <b>VR</b> SP <b>TV</b> W <b>AS</b> LS <b>SC</b> RA <b>W</b> SC <b>R</b>                          | 68  |
| Pistacia vera.         | <b>HL</b> CC <b>SL</b> KL... <b>LV</b> W <b>VR</b> SP <b>TV</b> W <b>AS</b> LS <b>SC</b> RA <b>W</b> SC <b>R</b>                          | 69  |
| Zanthoxylum bungeanum. | <b>HL</b> FS <b>HT</b> SC <b>LD</b> EN <b>RO</b> CL... <b>LR</b> HR <b>W</b> AS <b>LS</b> SC <b>RL</b> GL <b>SC</b>                       | 71  |
| Consensus              | l kl q krp aslse ey sqr                                                                                                                   |     |
| Citrus sinensis.       | <b>PT</b> EL <b>LD</b> T <b>NP</b> FI <b>RM</b> N <b>LS</b> EL <b>PL</b> Q <b>L</b> AE <b>LR</b> dv <b>F</b> vs <b>K</b>                  | 111 |
| Durio zibethinus.      | <b>PT</b> EL <b>LD</b> T <b>NP</b> FI <b>RM</b> N <b>LS</b> EL <b>PL</b> Q <b>L</b> AE <b>LR</b> dv <b>F</b> vs <b>K</b>                  | 115 |
| Herrania umbratica.    | <b>PT</b> EL <b>LD</b> T <b>NP</b> FI <b>RM</b> N <b>LS</b> EL <b>PL</b> Q <b>L</b> AE <b>LR</b> dv <b>F</b> vs <b>K</b>                  | 108 |
| Pistacia vera.         | <b>PT</b> EL <b>LD</b> T <b>NP</b> FI <b>RM</b> N <b>LS</b> EL <b>PL</b> Q <b>L</b> AE <b>LR</b> dv <b>F</b> vs <b>K</b>                  | 109 |
| Zanthoxylum bungeanum. | <b>PT</b> EL <b>LD</b> T <b>NP</b> FI <b>RM</b> N <b>LS</b> EL <b>PL</b> Q <b>L</b> AE <b>LR</b> dv <b>F</b> vs <b>K</b>                  | 111 |
| Consensus              | ptptldt nypihmnlsl elplqladelr dv f vsk                                                                                                   |     |
| Citrus sinensis.       | <b>TG</b> HLGS <b>SL</b> GV <b>EL</b> TV <b>AL</b> SV <b>FN</b> AP <b>CR</b> LV <b>W</b> GV <b>HQ</b> CV <b>PH</b>                        | 151 |
| Durio zibethinus.      | <b>TG</b> HLGS <b>SL</b> GV <b>EL</b> TV <b>AL</b> SV <b>FN</b> AP <b>CR</b> LV <b>W</b> GV <b>HQ</b> CV <b>PH</b>                        | 155 |
| Herrania umbratica.    | <b>TG</b> HLGS <b>SL</b> GV <b>EL</b> TV <b>AL</b> SV <b>FN</b> AP <b>CR</b> LV <b>W</b> GV <b>HQ</b> CV <b>PH</b>                        | 148 |
| Pistacia vera.         | <b>TG</b> HLGS <b>SL</b> GV <b>EL</b> TV <b>AL</b> SV <b>FN</b> AP <b>CR</b> LV <b>W</b> GV <b>HQ</b> CV <b>PH</b>                        | 149 |
| Zanthoxylum bungeanum. | <b>TG</b> HLGS <b>SL</b> GV <b>EL</b> TV <b>AL</b> SV <b>FN</b> AP <b>CR</b> LV <b>W</b> GV <b>HQ</b> CV <b>PH</b>                        | 151 |
| Consensus              | tghlgsstg eltvallhyfnap cr lvwgvhqj ph                                                                                                    |     |
| Citrus sinensis.       | <b>K</b> ILIG <b>R</b> RM <b>HT</b> MP <b>QT</b> GL <b>GF</b> TR <b>SE</b> SE <b>YD</b> CF <b>G</b> HS <b>ST</b>                          | 191 |
| Durio zibethinus.      | <b>K</b> ILIG <b>R</b> RM <b>HT</b> MP <b>QT</b> GL <b>GF</b> TR <b>SE</b> SE <b>YD</b> CF <b>G</b> HS <b>ST</b>                          | 195 |
| Herrania umbratica.    | <b>K</b> ILIG <b>R</b> RM <b>HT</b> MP <b>QT</b> GL <b>GF</b> TR <b>SE</b> SE <b>YD</b> CF <b>G</b> HS <b>ST</b>                          | 188 |
| Pistacia vera.         | <b>K</b> ILIG <b>R</b> RM <b>HT</b> MP <b>QT</b> GL <b>GF</b> TR <b>SE</b> SE <b>YD</b> CF <b>G</b> HS <b>ST</b>                          | 189 |
| Zanthoxylum bungeanum. | <b>K</b> ILIG <b>R</b> RM <b>HT</b> MP <b>QT</b> GL <b>GF</b> TR <b>SE</b> SE <b>YD</b> CF <b>G</b> HS <b>ST</b>                          | 191 |
| Consensus              | kiltqr kmhtwrqt gl gfrkseseydcfg ghsst                                                                                                    |     |
| Citrus sinensis.       | <b>TS</b> AGL <b>MA</b> VG <b>RD</b> GR <b>HR</b> NV <b>AV</b> IG <b>DA</b> MT <b>AG</b> CA <b>YE</b> AM <b>N</b>                         | 231 |
| Durio zibethinus.      | <b>TS</b> AGL <b>MA</b> VG <b>RD</b> GR <b>HR</b> NV <b>AV</b> IG <b>DA</b> MT <b>AG</b> CA <b>YE</b> AM <b>N</b>                         | 235 |
| Herrania umbratica.    | <b>TS</b> AGL <b>MA</b> VG <b>RD</b> GR <b>HR</b> NV <b>AV</b> IG <b>DA</b> MT <b>AG</b> CA <b>YE</b> AM <b>N</b>                         | 228 |
| Pistacia vera.         | <b>TS</b> AGL <b>MA</b> VG <b>RD</b> GR <b>HR</b> NV <b>AV</b> IG <b>DA</b> MT <b>AG</b> CA <b>YE</b> AM <b>N</b>                         | 229 |
| Zanthoxylum bungeanum. | <b>TS</b> AGL <b>MA</b> VG <b>RD</b> GR <b>HR</b> NV <b>AV</b> IG <b>DA</b> MT <b>AG</b> CA <b>YE</b> AM <b>N</b>                         | 231 |
| Consensus              | tsaqlmasvgd qk n vavigdgamtacgayeamn                                                                                                      |     |
| Citrus sinensis.       | <b>N</b> GYL <b>DS</b> CM <b>VI</b> L <b>ND</b> N <b>K</b> Q <b>VS</b> L <b>PT</b> A <b>LD</b> GI <b>PP</b> GA <b>LS</b> SA <b>L</b>      | 271 |
| Durio zibethinus.      | <b>N</b> GYL <b>DS</b> CM <b>VI</b> L <b>ND</b> N <b>K</b> Q <b>VS</b> L <b>PT</b> A <b>LD</b> GI <b>PP</b> GA <b>LS</b> SA <b>L</b>      | 272 |
| Herrania umbratica.    | <b>N</b> GYL <b>DS</b> CM <b>VI</b> L <b>ND</b> N <b>K</b> Q <b>VS</b> L <b>PT</b> A <b>LD</b> GI <b>PP</b> GA <b>LS</b> SA <b>L</b>      | 268 |
| Pistacia vera.         | <b>N</b> GYL <b>DS</b> CM <b>VI</b> L <b>ND</b> N <b>K</b> Q <b>VS</b> L <b>PT</b> A <b>LD</b> GI <b>PP</b> GA <b>LS</b> SA <b>L</b>      | 269 |
| Zanthoxylum bungeanum. | <b>N</b> GYL <b>DS</b> CM <b>VI</b> L <b>ND</b> N <b>K</b> Q <b>VS</b> L <b>PT</b> A <b>LD</b> GI <b>PP</b> GA <b>LS</b> SA <b>L</b>      | 271 |
| Consensus              | n gylsdcmvilndnkqvslpta ldgippvgalsal                                                                                                     |     |
| Citrus sinensis.       | <b>S</b> RLQ <b>NR</b> FL <b>RE</b> LV <b>AK</b> GV <b>TK</b> IG <b>GM</b> HL <b>AA</b> K <b>VE</b> Y <b>AR</b> G                         | 311 |
| Durio zibethinus.      | <b>S</b> RLQ <b>NR</b> FL <b>RE</b> LV <b>AK</b> GV <b>TK</b> IG <b>GM</b> HL <b>AA</b> K <b>VE</b> Y <b>AR</b> G                         | 315 |
| Herrania umbratica.    | <b>S</b> RLQ <b>NR</b> FL <b>RE</b> LV <b>AK</b> GV <b>TK</b> IG <b>GM</b> HL <b>AA</b> K <b>VE</b> Y <b>AR</b> G                         | 308 |
| Pistacia vera.         | <b>S</b> RLQ <b>NR</b> FL <b>RE</b> LV <b>AK</b> GV <b>TK</b> IG <b>GM</b> HL <b>AA</b> K <b>VE</b> Y <b>AR</b> G                         | 309 |
| Zanthoxylum bungeanum. | <b>S</b> RLQ <b>NR</b> FL <b>RE</b> LV <b>AK</b> GV <b>TK</b> IG <b>GM</b> HL <b>AA</b> K <b>VE</b> Y <b>AR</b> G                         | 311 |
| Consensus              | srqlsnrflrelelvakgvtkiggmhl laakvdeyarg                                                                                                   |     |
| Citrus sinensis.       | <b>W</b> ISGS <b>G</b> SL <b>FE</b> EL <b>GL</b> Y <b>IG</b> FD <b>GN</b> DDL <b>TS</b> HL <b>RV</b> AG <b>HN</b> K                       | 351 |
| Durio zibethinus.      | <b>W</b> ISGS <b>G</b> SL <b>FE</b> EL <b>GL</b> Y <b>IG</b> FD <b>GN</b> DDL <b>TS</b> HL <b>RV</b> AG <b>HN</b> K                       | 355 |
| Herrania umbratica.    | <b>W</b> ISGS <b>G</b> SL <b>FE</b> EL <b>GL</b> Y <b>IG</b> FD <b>GN</b> DDL <b>TS</b> HL <b>RV</b> AG <b>HN</b> K                       | 348 |
| Pistacia vera.         | <b>W</b> ISGS <b>G</b> SL <b>FE</b> EL <b>GL</b> Y <b>IG</b> FD <b>GN</b> DDL <b>TS</b> HL <b>RV</b> AG <b>HN</b> K                       | 349 |
| Zanthoxylum bungeanum. | <b>W</b> ISGS <b>G</b> SL <b>FE</b> EL <b>GL</b> Y <b>IG</b> FD <b>GN</b> DDL <b>TS</b> HL <b>RV</b> AG <b>HN</b> K                       | 351 |
| Consensus              | wisgags ifeelglyyigpvdgnh dcl ts hlrvaghnk                                                                                                |     |
| Citrus sinensis.       | <b>T</b> GPVL <b>IH</b> V <b>TE</b> RG <b>GY</b> FA <b>E</b> AA <b>CK</b> Y <b>H</b> GV <b>K</b> FD <b>PA</b> T <b>G</b> K <b>Q</b>       | 391 |
| Durio zibethinus.      | <b>T</b> GPVL <b>IH</b> V <b>TE</b> RG <b>GY</b> FA <b>E</b> AA <b>CK</b> Y <b>H</b> GV <b>K</b> FD <b>PA</b> T <b>G</b> K <b>Q</b>       | 395 |
| Herrania umbratica.    | <b>T</b> GPVL <b>IH</b> V <b>TE</b> RG <b>GY</b> FA <b>E</b> AA <b>CK</b> Y <b>H</b> GV <b>K</b> FD <b>PA</b> T <b>G</b> K <b>Q</b>       | 388 |
| Pistacia vera.         | <b>T</b> GPVL <b>IH</b> V <b>TE</b> RG <b>GY</b> FA <b>E</b> AA <b>CK</b> Y <b>H</b> GV <b>K</b> FD <b>PA</b> T <b>G</b> K <b>Q</b>       | 389 |
| Zanthoxylum bungeanum. | <b>T</b> GPVL <b>IH</b> V <b>TE</b> RG <b>GY</b> FA <b>E</b> AA <b>CK</b> Y <b>H</b> GV <b>K</b> FD <b>PA</b> T <b>G</b> K <b>Q</b>       | 391 |
| Consensus              | t gpvlilhvttekggyypae aackyhgv kfdpatgkq                                                                                                  |     |
| Citrus sinensis.       | <b>F</b> RS <b>AT</b> Q <b>SY</b> TT <b>Y</b> FA <b>E</b> AL <b>IA</b> EA <b>CH</b> DI <b>VA</b> IA <b>HA</b> MG <b>GT</b> G              | 431 |
| Durio zibethinus.      | <b>F</b> RS <b>AT</b> Q <b>SY</b> TT <b>Y</b> FA <b>E</b> AL <b>IA</b> EA <b>CH</b> DI <b>VA</b> IA <b>HA</b> MG <b>GT</b> G              | 435 |
| Herrania umbratica.    | <b>F</b> RS <b>AT</b> Q <b>SY</b> TT <b>Y</b> FA <b>E</b> AL <b>IA</b> EA <b>CH</b> DI <b>VA</b> IA <b>HA</b> MG <b>GT</b> G              | 428 |
| Pistacia vera.         | <b>F</b> RS <b>AT</b> Q <b>SY</b> TT <b>Y</b> FA <b>E</b> AL <b>IA</b> EA <b>CH</b> DI <b>VA</b> IA <b>HA</b> MG <b>GT</b> G              | 429 |
| Zanthoxylum bungeanum. | <b>F</b> RS <b>AT</b> Q <b>SY</b> TT <b>Y</b> FA <b>E</b> AL <b>IA</b> EA <b>CH</b> DI <b>VA</b> IA <b>HA</b> MG <b>GT</b> G              | 431 |
| Consensus              | frs atqsyctyfaeallaeae d alhaamgggtg                                                                                                      |     |
| Citrus sinensis.       | <b>L</b> N <b>FL</b> RR <b>FF</b> RC <b>FE</b> VG <b>IA</b> EQ <b>HA</b> VT <b>FA</b> AG <b>LA</b> CE <b>GL</b> K <b>PF</b> CA <b>I</b>   | 471 |
| Durio zibethinus.      | <b>L</b> N <b>FL</b> RR <b>FF</b> RC <b>FE</b> VG <b>IA</b> EQ <b>HA</b> VT <b>FA</b> AG <b>LA</b> CE <b>GL</b> K <b>PF</b> CA <b>I</b>   | 475 |
| Herrania umbratica.    | <b>L</b> N <b>FL</b> RR <b>FF</b> RC <b>FE</b> VG <b>IA</b> EQ <b>HA</b> VT <b>FA</b> AG <b>LA</b> CE <b>GL</b> K <b>PF</b> CA <b>I</b>   | 468 |
| Pistacia vera.         | <b>L</b> N <b>FL</b> RR <b>FF</b> RC <b>FE</b> VG <b>IA</b> EQ <b>HA</b> VT <b>FA</b> AG <b>LA</b> CE <b>GL</b> K <b>PF</b> CA <b>I</b>   | 469 |
| Zanthoxylum bungeanum. | <b>L</b> N <b>FL</b> RR <b>FF</b> RC <b>FE</b> VG <b>IA</b> EQ <b>HA</b> VT <b>FA</b> AG <b>LA</b> CE <b>GL</b> K <b>PF</b> CA <b>I</b>   | 471 |
| Consensus              | ln flrrfp rcfvgiaeqhvtfaaglanceglkpfcai                                                                                                   |     |
| Citrus sinensis.       | <b>Y</b> SSF <b>MC</b> RA <b>Y</b> D <b>Q</b> VB <b>HV</b> EL <b>Q</b> KL <b>PF</b> VB <b>F</b> AM <b>DR</b> GL <b>VG</b> AD <b>GP</b> TH | 511 |
| Durio zibethinus.      | <b>Y</b> SSF <b>MC</b> RA <b>Y</b> D <b>Q</b> VB <b>HV</b> EL <b>Q</b> KL <b>PF</b> VB <b>F</b> AM <b>DR</b> GL <b>VG</b> AD <b>GP</b> TH | 515 |
| Herrania umbratica.    | <b>Y</b> SSF <b>MC</b> RA <b>Y</b> D <b>Q</b> VB <b>HV</b> EL <b>Q</b> KL <b>PF</b> VB <b>F</b> AM <b>DR</b> GL <b>VG</b> AD <b>GP</b> TH | 508 |
| Pistacia vera.         | <b>Y</b> SSF <b>MC</b> RA <b>Y</b> D <b>Q</b> VB <b>HV</b> EL <b>Q</b> KL <b>PF</b> VB <b>F</b> AM <b>DR</b> GL <b>VG</b> AD <b>GP</b> TH | 509 |
| Zanthoxylum bungeanum. | <b>Y</b> SSF <b>MC</b> RA <b>Y</b> D <b>Q</b> VB <b>HV</b> EL <b>Q</b> KL <b>PF</b> VB <b>F</b> AM <b>DR</b> GL <b>VG</b> AD <b>GP</b> TH | 511 |
| Consensus              | yssfmcraydqvbhvdqlklpfvbfamdr glvgadgpth                                                                                                  |     |
| Citrus sinensis.       | <b>C</b> G <b>FD</b> VT <b>FM</b> AC <b>LF</b> PN <b>VM</b> VA <b>FS</b> DE <b>AE</b> LF <b>HN</b> V <b>AT</b> A <b>ID</b> DR <b>P</b>    | 551 |
| Durio zibethinus.      | <b>C</b> G <b>FD</b> VT <b>FM</b> AC <b>LF</b> PN <b>VM</b> VA <b>FS</b> DE <b>AE</b> LF <b>HN</b> V <b>AT</b> A <b>ID</b> DR <b>P</b>    | 555 |
| Herrania umbratica.    | <b>C</b> G <b>FD</b> VT <b>FM</b> AC <b>LF</b> PN <b>VM</b> VA <b>FS</b> DE <b>AE</b> LF <b>HN</b> V <b>AT</b> A <b>ID</b> DR <b>P</b>    | 548 |
| Pistacia vera.         | <b>C</b> G <b>FD</b> VT <b>FM</b> AC <b>LF</b> PN <b>VM</b> VA <b>FS</b> DE <b>AE</b> LF <b>HN</b> V <b>AT</b> A <b>ID</b> DR <b>P</b>    | 549 |
| Zanthoxylum bungeanum. | <b>C</b> G <b>FD</b> VT <b>FM</b> AC <b>LF</b> PN <b>VM</b> VA <b>FS</b> DE <b>AE</b> LF <b>HN</b> V <b>AT</b> A <b>ID</b> DR <b>P</b>    | 551 |
| Consensus              | cg fdvtfmaclfpnvmvafsdelaelfhnvata aidrpp                                                                                                 |     |
| Citrus sinensis.       | <b>SC</b> FR <b>Y</b> PR <b>GN</b> GV <b>GL</b> FG <b>GN</b> GV <b>PL</b> EG <b>GR</b> VL <b>EG</b> SV <b>AL</b>                          | 591 |
| Durio zibethinus.      | <b>SC</b> FR <b>Y</b> PR <b>GN</b> GV <b>GL</b> FG <b>GN</b> GV <b>PL</b> EG <b>GR</b> VL <b>EG</b> SV <b>AL</b>                          | 595 |
| Herrania umbratica.    | <b>SC</b> FR <b>Y</b> PR <b>GN</b> GV <b>GL</b> FG <b>GN</b> GV <b>PL</b> EG <b>GR</b> VL <b>EG</b> SV <b>AL</b>                          | 588 |
| Pistacia vera.         | <b>SC</b> FR <b>Y</b> PR <b>GN</b> GV <b>GL</b> FG <b>GN</b> GV <b>PL</b> EG <b>GR</b> VL <b>EG</b> SV <b>AL</b>                          | 589 |
| Zanthoxylum bungeanum. | <b>SC</b> FR <b>Y</b> PR <b>GN</b> GV <b>GL</b> FG <b>GN</b> GV <b>PL</b> EG <b>GR</b> VL <b>EG</b> SV <b>AL</b>                          | 591 |
| Consensus              | scfryprng gv lp gmkp ple gkqr i eg sval                                                                                                   |     |
| Citrus sinensis.       | <b>L</b> GY <b>G</b> AV <b>Q</b> CL <b>PA</b> RL <b>EL</b> SG <b>EL</b> TV <b>AD</b> AR <b>FC</b> FL <b>EL</b> D <b>HI</b>                | 631 |
| Durio zibethinus.      | <b>L</b> GY <b>G</b> AV <b>Q</b> CL <b>PA</b> RL <b>EL</b> SG <b>EL</b> TV <b>AD</b> AR <b>FC</b> FL <b>EL</b> D <b>HI</b>                | 635 |
| Herrania umbratica.    | <b>L</b> GY <b>G</b> AV <b>Q</b> CL <b>PA</b> RL <b>EL</b> SG <b>EL</b> TV <b>AD</b> AR <b>FC</b> FL <b>EL</b> D <b>HI</b>                | 628 |
| Pistacia vera.         | <b>L</b> GY <b>G</b> AV <b>Q</b> CL <b>PA</b> RL <b>EL</b> SG <b>EL</b> TV <b>AD</b> AR <b>FC</b> FL <b>EL</b> D <b>HI</b>                | 629 |
| Zanthoxylum bungeanum. | <b>L</b> GY <b>G</b> AV <b>Q</b> CL <b>PA</b> RL <b>EL</b> SG <b>EL</b> TV <b>AD</b> AR <b>FC</b> FL <b>EL</b> D <b>HI</b>                | 631 |
| Consensus              | lgyg avq cl a ll ql ltvdarfcfclpdl l                                                                                                      |     |
| Citrus sinensis.       | <b>R</b> L <b>AG</b> SE <b>LV</b> IT <b>VE</b> ES <b>IG</b> SG <b>SH</b> V <b>Q</b> FL <b>AG</b> DL <b>LD</b> GT <b>VK</b>                | 671 |
| Durio zibethinus.      | <b>R</b> L <b>AG</b> SE <b>LV</b> IT <b>VE</b> ES <b>IG</b> SG <b>SH</b> V <b>Q</b> FL <b>AG</b> DL <b>LD</b> GT <b>VK</b>                | 675 |
| Herrania umbratica.    | <b>R</b> L <b>AG</b> SE <b>LV</b> IT <b>VE</b> ES <b>IG</b> SG <b>SH</b> V <b>Q</b> FL <b>AG</b> DL <b>LD</b> GT <b>VK</b>                | 668 |
| Pistacia vera.         | <b>R</b> L <b>AG</b> SE <b>LV</b> IT <b>VE</b> ES <b>IG</b> SG <b>SH</b> V <b>Q</b> FL <b>AG</b> DL <b>LD</b> GT <b>VK</b>                | 669 |
| Zanthoxylum bungeanum. | <b>R</b> L <b>AG</b> SE <b>LV</b> IT <b>VE</b> ES <b>IG</b> SG <b>SH</b> V <b>Q</b> FL <b>AG</b> DL <b>LD</b> GT <b>VK</b>                | 671 |
| Consensus              | r la sh l tveesigsgshv qfla dglldgtvk                                                                                                     |     |
| Citrus sinensis.       | <b>WR</b> F <b>VL</b> PD <b>VI</b> CH <b>GS</b> FA <b>D</b> QL <b>CA</b> GL <b>TS</b> HA <b>IA</b> VT <b>FN</b> IL <b>GG</b>              | 711 |
| Durio zibethinus.      | <b>WR</b> F <b>VL</b> PD <b>VI</b> CH <b>GS</b> FA <b>D</b> QL <b>CA</b> GL <b>TS</b> HA <b>IA</b> VT <b>FN</b> IL <b>GG</b>              | 715 |
| Herrania umbratica.    | <b>WR</b> F <b>VL</b> PD <b>VI</b> CH <b>GS</b> FA <b>D</b> QL <b>CA</b> GL <b>TS</b> HA <b>IA</b> VT <b>FN</b> IL <b>GG</b>              | 708 |
| Pistacia vera.         | <b>WR</b> F <b>VL</b> PD <b>VI</b> CH <b>GS</b> FA <b>D</b> QL <b>CA</b> GL <b>TS</b> HA <b>IA</b> VT <b>FN</b> IL <b>GG</b>              | 709 |
| Zanthoxylum bungeanum. | <b>WR</b> F <b>VL</b> PD <b>VI</b> CH <b>GS</b> FA <b>D</b> QL <b>CA</b> GL <b>TS</b> HA <b>IA</b> VT <b>FN</b> IL <b>GG</b>              | 682 |
| Consensus              | wrf vlpd vi                                                                                                                               |     |
| Citrus sinensis.       | <b>T</b> RE <b>AL</b> E <b>IM</b> SR                                                                                                      | 722 |
| Durio zibethinus.      | <b>T</b> RE <b>AL</b> E <b>IM</b> SR                                                                                                      | 726 |
| Herrania umbratica.    | <b>T</b> RE <b>AL</b> E <b>IM</b> SR                                                                                                      | 719 |
| Pistacia vera.         | <b>T</b> RE <b>AL</b> E <b>IM</b> SR                                                                                                      | 720 |
| Zanthoxylum bungeanum. | <b>T</b> RE <b>AL</b> E <b>IM</b> SR                                                                                                      | 682 |
| Consensus              |                                                                                                                                           |     |
