# Supplementary material for: Molecular Cloning and Functional Analysis of DXS and FPS Genes from Zanthoxylum bungeanum Maxim
Source: MDPI journal article supplement (doi:10.3390/foods11121746), 2022-06-14
Supplement: s1 [file s1]

|                       |                                            |     |
|-----------------------|--------------------------------------------|-----|
| Citrus_clementina     | MSDLKSRFIEVYGVLKCELLNDPAFEEDHDSRQWVERMLD   | 40  |
| Coffea_arabica        | MSDLKAKFLEVYSVLKSELLNDPAFEETDDSRQWVERMLD   | 40  |
| Gardenia_jasminoides  | MSDLRAKFLEVYSVLKSELLNDPAFEETDDSRQWVERMLD   | 40  |
| Panax_japonicus       | MSDLKTRFLEVYSVLKSELLNDPAFEETDDSRQWVERMLD   | 40  |
| Zanthoxylum_bungeanum | MSDLKSRFIEVYGVLKCELLNDPAFEEDHVSQWVERMLD    | 40  |
| Consensus             | msdl f evy lk ellndpafef srqw rml d        |     |
| Citrus_clementina     | YNVPGGKLNRLSVVDSYKLLKEGKELTDDEFFLSSALGW    | 80  |
| Coffea_arabica        | YNVPGGKLNRLSVVDSYKLLKEGKELTSDETFLACALGW    | 80  |
| Gardenia_jasminoides  | YNVPGGKLNRLSVVDSYKLLKEGKELTSDETFLACALGW    | 80  |
| Panax_japonicus       | YNVPGGKLNRLSVVDSYKLLKEGKELTSDDEFFLSSALGW   | 80  |
| Zanthoxylum_bungeanum | YNVPGGKLNRLSVVDSYKLLKEGKELTDDEFFLSSALGW    | 80  |
| Consensus             | ynvpggklnrglsv dsy llkeg el de fl algw     |     |
| Citrus_clementina     | CIEWLQAYFLVDDIMDGSHTRRGQPCWFRPKVGMIAAN     | 120 |
| Coffea_arabica        | CIEWLQAYFLVDDIMDGSHTRRGQPCWFRPKVGMIAAN     | 120 |
| Gardenia_jasminoides  | CIEWLQAYFLVDDIMDGSHTRRGQPCWFRPKVGMIAAN     | 120 |
| Panax_japonicus       | CIEWLQAYFLVDDIMDSSHTRRGQPCWFRPKVGMIAVN     | 120 |
| Zanthoxylum_bungeanum | CIEWLQAYFLVDDIMDGSHTRRGQPCWFRPKVGMIAAN     | 120 |
| Consensus             | c ewlqayflv ddimd shtrrgqpcwfr pkvgmia n   |     |
| Citrus_clementina     | DGVILRNHISRILKNHFRDKPYYVDLLDLFNEVEFQTASG   | 160 |
| Coffea_arabica        | DGIILRNHISRILKNHFRGKPYVVDLLDLFNEVEFQTASG   | 160 |
| Gardenia_jasminoides  | DGIILRNHISRILKNHFRDKPYYVDLLDLFNEVEFQTASG   | 160 |
| Panax_japonicus       | DGIILRNHISRILKNHFRGKPYVVDLLDLFNEVEFQTASG   | 160 |
| Zanthoxylum_bungeanum | DGVILRNHISRILKNHFRGKPYVVDLLDLFNEVEFQTASG   | 160 |
| Consensus             | dg lrnhi ril k hfr kpyyvdlldlfnevefqtasg   |     |
| Citrus_clementina     | QMIDLITTIEGEKDSLKYSLEHRRIVQYKTAYYSFYLPV    | 200 |
| Coffea_arabica        | QMIDLITTLVGEKDSLKYSLEHRRIVQYKTAYYSFYLPV    | 200 |
| Gardenia_jasminoides  | QMIDLITTFVGEKDSLKYSLEHRRIVQYKTAYYSFYLPV    | 200 |
| Panax_japonicus       | QMIDLITTLVGEKDSLKYSLEHRRIVQYKTAYYSFYLPV    | 200 |
| Zanthoxylum_bungeanum | QMIDLITTIEGEKDSLKYSLEHRRIVQYKTAYYSFYLPV    | 200 |
| Consensus             | qmidlitt gekdlskyslp hrrivqyktayysfylv     |     |
| Citrus_clementina     | ACALLMAGENLDKHEVEVRDILVCMGYFQVQDDLDLDCFGS  | 240 |
| Coffea_arabica        | ACALLMSGENLDNHIDVKEILIBMGIYFQVQDDLDLDCYGD  | 240 |
| Gardenia_jasminoides  | ACALLMSGENLDNHNDVKEILIBMGIYFQVQDDLDLDCYGD  | 240 |
| Panax_japonicus       | ACALLMSGEDLEKHTNVKDIILIBMGIYFQVQDDLDLDCFGA | 240 |
| Zanthoxylum_bungeanum | ACALLMAGENLDKHEVEVRDILVCMGYFQVQDDLDLDCFGS  | 240 |
| Consensus             | acallm ge l h vk il mg yfqvqdd ldc g       |     |
| Citrus_clementina     | PEVIGKVGTDIEDFKCSWLVVKALELONEEQKRLHENYG    | 280 |
| Coffea_arabica        | PEVIGKIGTDIEDFKCSWLVVKALEVONEEQKRLHENYG    | 280 |
| Gardenia_jasminoides  | PEVIGKIGTDIEDFKCSWLVVKALELONEEQKRLHENYG    | 280 |
| Panax_japonicus       | PEVIGKIGTDIEDFKCSWLVVKALELSNEEQKRLHENYG    | 280 |
| Zanthoxylum_bungeanum | PEVIGKVGTDIEDFKCSWLVVKALELONEEQKRLHENYG    | 280 |
| Consensus             | pevigk gtdied kcsw vvkale neeq k enyg      |     |
| Citrus_clementina     | KVDFACVAKVKELYKTLDLEGVFEYERESYKLIKISIEA    | 320 |
| Coffea_arabica        | KQDFACVAKVKELYEALKIQDVFEYERKSYKLIKNGIEA    | 320 |
| Gardenia_jasminoides  | KQDFACVAKVKELYKVLKIQDVFEFEKKSSEYKLIKNSIEA  | 320 |
| Panax_japonicus       | KDDFTSVAKVKELYNTLKLQDVFEYERESYKLIKIFIEA    | 320 |
| Zanthoxylum_bungeanum | KAVEACVAKVKELYKTLDLEGVFEYERESYKLIKIESIEA   | 320 |
| Consensus             | k p vakvkely l f e e sy kl iea             |     |
| Citrus_clementina     | HETKEVQAVLKSFLAKIYKRQ                      | 341 |
| Coffea_arabica        | HESKAVQAVLKSFLSKIYKRQ                      | 341 |
| Gardenia_jasminoides  | HESKAVQAVLKSFLSKIYKRQ                      | 341 |
| Panax_japonicus       | HESQAVQAVLKSFLGIYKRQ                       | 341 |
| Zanthoxylum_bungeanum | HESKAVQAVLKSFLAKIYKRQ                      | 341 |
| Consensus             | hp vgavlksfl kiykrq                        |     |

**Figure S3.** Deduced amino acid sequences of the conserved regions of ZbFPS. The conserved domains are boxed. Homology level was highlighted by shading in color: black for 100%, pink for  $\geq 75\%$  and blue for  $\geq 50\%$  identity.
