# Supplementary material for: Molecular Cloning and Functional Analysis of DXS and FPS Genes from Zanthoxylum bungeanum Maxim
Source: MDPI journal article supplement (doi:10.3390/foods11121746), 2022-06-14
Supplement: s1 [file s1]

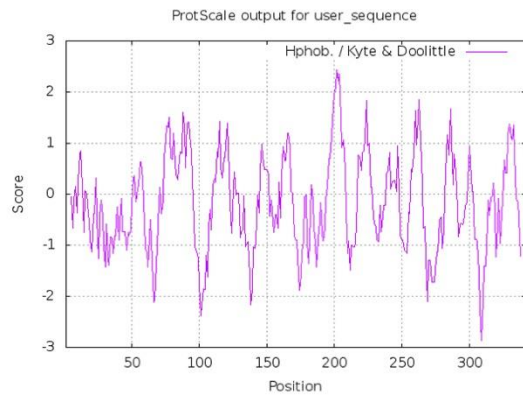

(a)

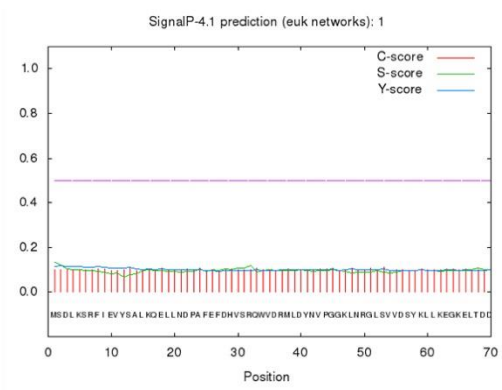

(b)

**Figure S4.** Analysis of protein sequence traits. Hydrophobicity and hydrophilicity prediction of ZbFPS (a). Signal peptide analysis result of ZbFPS (b). C-score: possibility of cleavage site; S-score: possibility of amino acid being signal peptide; Y-score: derivative of binding C-score and S-score.
