# Supplementary material for: Molecular Cloning and Functional Analysis of DXS and FPS Genes from Zanthoxylum bungeanum Maxim
Source: MDPI journal article supplement (doi:10.3390/foods11121746), 2022-06-14
Supplement: s1 [file s1]

**Table S3.** Sequence identity, GMQE, and QMEAN for ZbDXS and ZbFPS

| Gene name    | Seq Identity | GMQE | QMEAN |
|--------------|--------------|------|-------|
| <i>ZbDXS</i> | 41.34%       | 0.63 | -3.04 |
| <i>ZbFPS</i> | 82.06%       | 0.96 | -0.06 |
