# Supplementary material for: Molecular Cloning and Functional Analysis of DXS and FPS Genes from Zanthoxylum bungeanum Maxim
Source: MDPI journal article supplement (doi:10.3390/foods11121746), 2022-06-14
Supplement: s1 [file s1]

**Table S1.** Primers used in the experiment

| Primers             | Sequence (5'-3')                                      | Description                           |
|---------------------|-------------------------------------------------------|---------------------------------------|
| <i>FPS-pET28a-F</i> | TGGGTCGCGGATCCGAATTCAGTGATCTGAAGTCGAGATT              | Prokaryotic expression for <i>FPS</i> |
| <i>FPS-pET28a-R</i> | TCGAGTGC GGCCGCAAGCTTGTTACTTCTGTCTCTTGTATATCTTAGC     | Prokaryotic expression for <i>FPS</i> |
| <i>FPS-pBI121-F</i> | AGAACACGGGGGACTCTAGACAGTGATCTGAAGTCGAGATT             | Transient expression for <i>FPS</i>   |
| <i>FPS-pBI121-R</i> | GACTGACCACCCGGGGATCCTTACTTCTGTCTCTTGTATATCTTAGC       | Transient expression for <i>FPS</i>   |
| <i>DXS-pET28a-F</i> | TGGGTCGCGGATCCGAATTCGCTCTCTCTGCATTCTCATTTC AAC        | Prokaryotic expression for <i>DXS</i> |
| <i>DXS-pET28a-R</i> | TCGAGTGC GGCCGCAAGCTTGTTAGTTTTTGAATGACATTATCTCGAGAGCC | Prokaryotic expression for <i>DXS</i> |
| <i>DXS-pBI121-F</i> | AGAACACGGGGGACTCTAGACGCTCTCTCTGCATTCTCA               | Transient expression for <i>DXS</i>   |
| <i>DXS-pBI121-R</i> | GACTGACCACCCGGGGATCC TTAGTTTTTGAATGACATTATCTCG        | Transient expression for <i>DXS</i>   |
| <i>DXS-F</i>        | TCAATCTCAAAGACCACCAACACCTC                            | RT-qPCR of <i>DXS</i>                 |
| <i>DXS-R</i>        | GACATCCGACCGCAACTCATCTG                               | RT-qPCR of <i>DXS</i>                 |
| <i>FPS-F</i>        | GCCACTTCATCGTCGCATTGTTC                               | RT-qPCR of <i>FPS</i>                 |
| <i>FPS-R</i>        | TGTCAAGATTCTCGCCTGCCATAAG                             | RT-qPCR of <i>FPS</i>                 |
| <i>UBQ-F</i>        | TCGAAGATGGCCGTACATTG                                  | RT-qPCR of <i>UBQ</i>                 |
| <i>UBQ-R</i>        | TCCTCTAAGCCTCAGCACCA                                  | RT-qPCR of <i>UBQ</i>                 |
| <i>UBA-F</i>        | GACTTAGGGGAGGGATTATTGAG                               | RT-qPCR of <i>UBA</i>                 |
| <i>UBA-R</i>        | TTCTTCTTCCGACAGTTTACAGC                               | RT-qPCR of <i>UBA</i>                 |
