# Supplementary material for: Molecular Cloning and Functional Analysis of DXS and FPS Genes from Zanthoxylum bungeanum Maxim
Source: MDPI journal article supplement (doi:10.3390/foods11121746), 2022-06-14
Supplement: s1 [file s1]

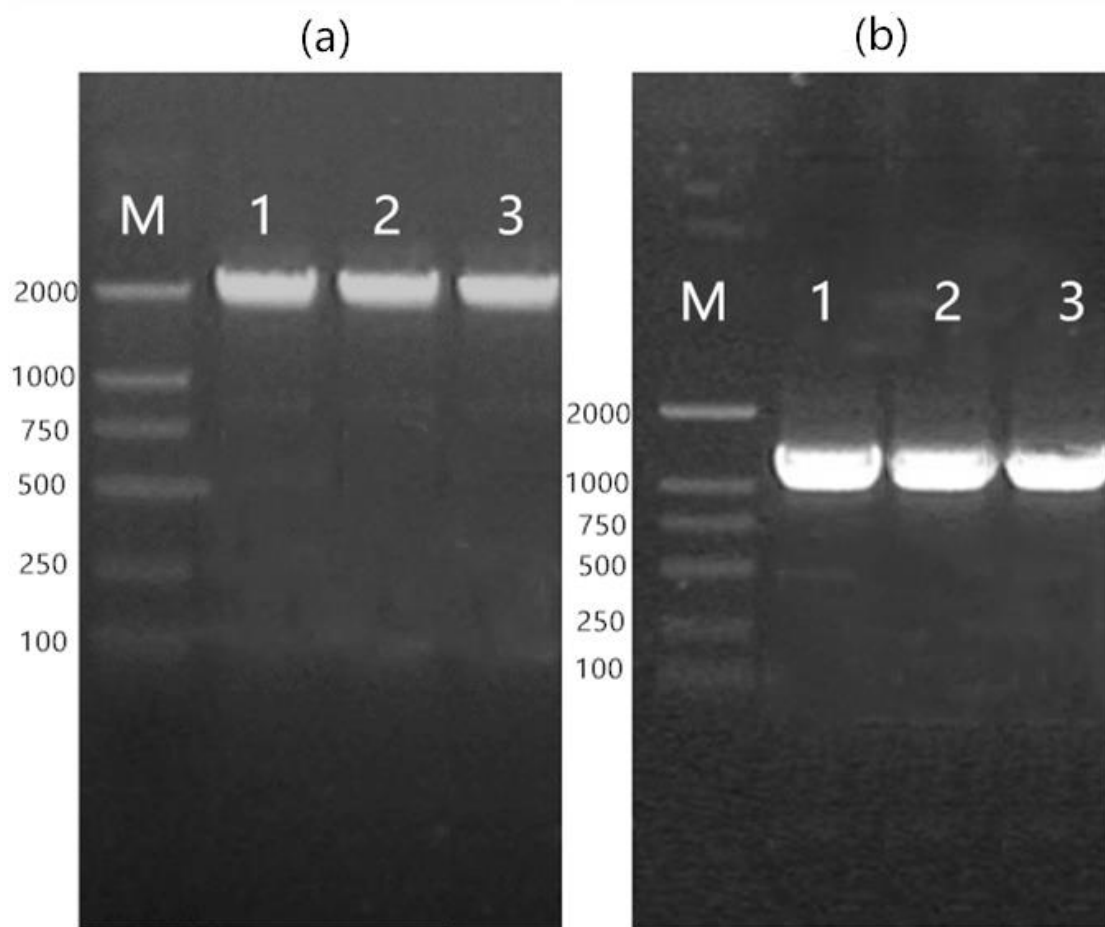

**Figure S1.** Amplification of CDSs of *ZbDXS* and *ZbFPS* in *Z. bungeanum*. *ZbDXS* amplification. M: DNA marker (DL2000) 1-3: PCR products (a). *ZbFPS* amplification. M: DNA marker (DL2000) 1-3: PCR products (b).
