# Supplementary material for: Molecular Cloning and Functional Analysis of DXS and FPS Genes from Zanthoxylum bungeanum Maxim
Source: MDPI journal article supplement (doi:10.3390/foods11121746), 2022-06-14
Supplement: s1 [file s1]

**Table S2.** Sequence information for ZbFPS.

| <b>Gene name</b> | <b>Amino acid sequence (aa)</b> | <b>Molecular weight (kDa)</b> | <b>PI</b> | <b>Formula</b>                                                                        | <b>Instability index</b> | <b>Aliphatic index</b> |
|------------------|---------------------------------|-------------------------------|-----------|---------------------------------------------------------------------------------------|--------------------------|------------------------|
| <i>ZbFPS</i>     | 342                             | 39.472                        | 5.53      | C <sub>1797</sub> H <sub>2789</sub> N <sub>455</sub> O <sub>516</sub> S <sub>14</sub> | 37.69                    | 97.16                  |
