# Supplementary figures and images for: Molecular Cloning and Functional Analysis of DXS and FPS Genes from Zanthoxylum bungeanum Maxim
Source: MDPI journal article supplement (doi:10.3390/foods11121746), 2022-06-14

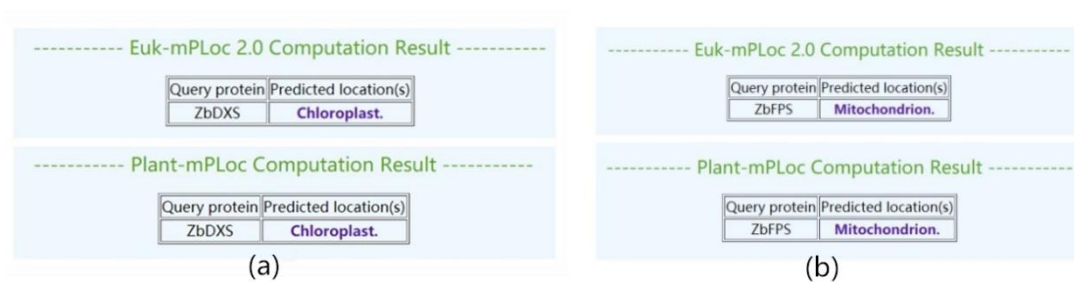

**Figure S5.** Predicting subcellular localization of ZbDXS (a) and ZbFPS (b).

Supplement: s1 [file s1]
